# Supplementary material
Source: ML conference proceedings conference paper supplement (https://proceedings.mlr.press/v97/shen19a.html)
Supplement: Supplementary file [file shen19a-supp.pdf]

## A. Proofs

**Proposition 1** Suppose  $dsep_G(\mathbf{X}, \mathbf{Z}, \mathbf{Y})$  holds but  $dsep_{G^*}(\mathbf{X}^*, \mathbf{Z}^*, \mathbf{Y}^*)$  does not hold. There must exist a path in  $G^*$  that connects  $\mathbf{X}^*$  and  $\mathbf{Y}^*$  but is not blocked by  $\mathbf{Z}^*$ . This path also connects  $\mathbf{X}$  and  $\mathbf{Y}$  in  $G$ . Moreover, it is not blocked by  $\mathbf{Z}$  since no variable in  $\mathbf{Z} \setminus \mathbf{Z}^*$  can be on this path. This is a contradiction with  $dsep_G(\mathbf{X}, \mathbf{Z}, \mathbf{Y})$ . Hence  $dsep_{G^*}(\mathbf{X}^*, \mathbf{Z}^*, \mathbf{Y}^*)$  holds.  $\square$

**Proposition 2** Suppose  $dsep_G(X, \mathbf{Z}, \mathbf{Y})$  holds but  $dsep_G(\mathbf{U} \setminus \mathbf{Z}, \mathbf{Z}, \mathbf{Y})$  does not hold. We have  $\mathbf{U} \cap \mathbf{Y} = \emptyset$  by  $dsep_G(X, \mathbf{Z}, \mathbf{Y})$ . Moreover, there must exist a path connecting some  $U \in \mathbf{U} \setminus \mathbf{Z}$  and  $\mathbf{Y}$  that is not blocked by  $\mathbf{Z}$ . If  $X$  is on this path, then we have a path connecting  $X$  and  $\mathbf{Y}$  that is not blocked by  $\mathbf{Z}$ . Otherwise, augmenting this path with the edge  $X \leftarrow U$  leads to a path with the same properties. Either case contradicts  $dsep_G(X, \mathbf{Z}, \mathbf{Y})$ .  $\square$

**Proposition 3** Suppose  $dsep_G(\mathbf{X}, \mathbf{Z}, \mathbf{Y})$ . A leaf node outside  $\mathbf{X} \cup \mathbf{Y} \cup \mathbf{Z}$  is irrelevant to  $P(\mathbf{x}|\mathbf{z}\mathbf{y})$ , so repeatedly remove all such leaf nodes. Prune edges outgoing from nodes  $\mathbf{Z}$  as this does not change the value of  $P(\mathbf{x}|\mathbf{z}\mathbf{y})$  either. Nodes  $\mathbf{X}$  are now disconnected from  $\mathbf{Y}$ . If  $dsep_G(T, \mathbf{Z}, \mathbf{Y})$  does not hold, then node  $T$  is connected to  $\mathbf{Y}$  and disconnected from  $\mathbf{X}$  so  $P(\mathbf{x}|\mathbf{z}\mathbf{y})$  cannot depend on the CPT of  $T$ . Hence, if  $P(\mathbf{x}|\mathbf{z}\mathbf{y})$  depends on the CPT of  $T$ , then  $dsep_G(T, \mathbf{Z}, \mathbf{Y})$ .  $\square$

The next proof uses the following corollary of Proposition 1.

**Corollary 1** If  $dsep_G(\mathbf{X}, \mathbf{Z}, \mathbf{Y})$ ,  $G$  is a proper superset of  $G_i$  and  $G_i$  is a proper superset of  $G_j$ , then  $dsep_{G_i}(\mathbf{X}_j, \mathbf{Z}_j, \mathbf{Y}_j)$ , where  $\mathbf{X}_j, \mathbf{Y}_j, \mathbf{Z}_j$  are the subsets of  $\mathbf{X}, \mathbf{Y}, \mathbf{Z}$  in DAG  $G_j$ .

**Theorem 1** The proof is by induction on DAGs  $G_1, \dots, G_{n+1}$  in Definition 1. We will show: if  $dsep_{G_i}(X_k, \mathbf{Z}_i, \mathbf{Y}_i)$ , the CPT for node  $X_k$  is independent of  $\mathbf{Y}_i$  given  $\mathbf{Z}_i$ . Here,  $\mathbf{Y}_i$  and  $\mathbf{Z}_i$  are projections of  $\mathbf{Y}$  and  $\mathbf{Z}$  on some proper subset of  $G_i$ . The theorem statement is for  $i = n + 1$ .

This holds trivially for  $G_1$  (empty). Consider  $G_i$  for  $i > 1$  and assume this holds for  $G_j$ , where  $j < i$ . Suppose  $dsep_{G_i}(X_k, \mathbf{Z}_i, \mathbf{Y}_i)$  for  $k < i$ . Then  $G_k$  is a proper subset of  $G_i$  and contains parents  $\mathbf{U}_k$  of node  $X_k$ . We have  $dsep_{G_i}(\mathbf{U}_k \setminus \mathbf{Z}_i, \mathbf{Z}_i, \mathbf{Y}_i)$  by Proposition 2 and  $dsep_{G_k}(\mathbf{U}_k \setminus \mathbf{Z}_k, \mathbf{Z}_k, \mathbf{Y}_k)$  by Corollary 1. The CPT of node  $X_k$  is selected in  $G_k$  based on  $P_k(\mathbf{U}_k|\mathbf{z}_k\mathbf{y}_k)$ . Consider node  $X_m$  in  $G_k$  ( $m < k$ ). By Proposition 3, if the CPT of node  $X_m$  is relevant to  $P_k(\mathbf{U}_k|\mathbf{z}_k\mathbf{y}_k)$ , then  $dsep_{G_k}(X_m, \mathbf{Z}_k, \mathbf{Y}_k)$ . By the induction hypothesis, this CPT is independent of  $\mathbf{Y}_k$  given  $\mathbf{Z}_k$ . That is, every CPT in  $G_k$  that is relevant to  $P_k(\mathbf{U}_k|\mathbf{z}_k\mathbf{y}_k)$  is independent of  $\mathbf{Y}_k$  given  $\mathbf{Z}_k$ . Moreover,  $P_k(\mathbf{U}_k|\mathbf{z}_k\mathbf{y}_k) = P_k(\mathbf{U}_k|\mathbf{z}_k)$  since

$dsep_{G_k}(\mathbf{U}_k \setminus \mathbf{Z}_k, \mathbf{Z}_k, \mathbf{Y}_k)$ . Hence, the CPT of node  $X_k$  is independent of  $\mathbf{Y}_k$  given  $\mathbf{Z}_k$  and of  $\mathbf{Y}_i$  given  $\mathbf{Z}_i$ .  $\square$

**Theorem 2** Assume  $dsep_G(\mathbf{X}, \mathbf{Z}, \mathbf{Y})$ . We show  $Q(\mathbf{x}|\mathbf{y}\mathbf{z}) = Q(\mathbf{x}|\mathbf{z})$ , which reduces to  $P^{z\mathbf{y}}(\mathbf{x}|\mathbf{z}\mathbf{y}) = P^z(\mathbf{x}|\mathbf{z})$ . By Proposition 3, if  $P^{z\mathbf{y}}(\mathbf{x}|\mathbf{z}\mathbf{y})$  depends on the CPT of some node  $T$ , then  $dsep_G(T, \mathbf{Z}, \mathbf{Y})$ . By Theorem 1, this CPT is independent of  $\mathbf{Y}$  given  $\mathbf{Z}$ . Hence,  $P^{z\mathbf{y}}(\mathbf{x}|\mathbf{z}\mathbf{y}) = P^z(\mathbf{x}|\mathbf{z}\mathbf{y})$ . Moreover,  $P^z(\mathbf{x}|\mathbf{z}\mathbf{y}) = P^z(\mathbf{x}|\mathbf{z})$  since  $dsep_G(\mathbf{X}, \mathbf{Z}, \mathbf{Y})$ . Therefore,  $P^{z\mathbf{y}}(\mathbf{x}|\mathbf{z}\mathbf{y}) = P^z(\mathbf{x}|\mathbf{z})$ .  $\square$

**Theorem 3** The TAC can simulate the AC by setting its parameters  $\theta_{x|\mathbf{u}}^+$  and  $\theta_{x|\mathbf{u}}^-$  to the corresponding parameter  $\theta_{x|\mathbf{u}}$  in the AC. Hence, the TAC is no less expressive than the AC. Proposition 4 identifies a class of functions that cannot be represented by an AC. A function in this class is given in Section 5.3 (kidney stones), which can be represented by a corresponding TAC. Hence, the TAC is more expressive than the AC.  $\square$

**Proposition 4**  $P(c|a, b) > P(c|\bar{a}, b)$  and  $P(c|a, \bar{b}) > P(c|\bar{a}, \bar{b})$  imply  $\theta_{c|ab} > \theta_{c|\bar{a}b}$  and  $\theta_{c|a\bar{b}} > \theta_{c|\bar{a}\bar{b}}$ . Moreover,  $P(c|a) = \theta_b\theta_{c|ab} + \theta_{\bar{b}}\theta_{c|a\bar{b}}$  and  $P(c|\bar{a}) = \theta_b\theta_{c|\bar{a}b} + \theta_{\bar{b}}\theta_{c|\bar{a}\bar{b}}$ . Hence,  $P(c|a) - P(c|\bar{a}) = \theta_b(\theta_{c|ab} - \theta_{c|\bar{a}b}) + \theta_{\bar{b}}(\theta_{c|a\bar{b}} - \theta_{c|\bar{a}\bar{b}}) > 0$ .  $\square$
